# Supplementary material for: Targeting G-quadruplex DNA and B-DNA with a natural alkaloid: a comparative spectroscopic study
Source: Royal Society of Chemistry journal article supplement (doi:10.1039/c6ra22776g), 2016-01-01
Supplement: c6ra22776g1.pdf [file c6ra22776g1.pdf]

### Electronic Supplementary Information

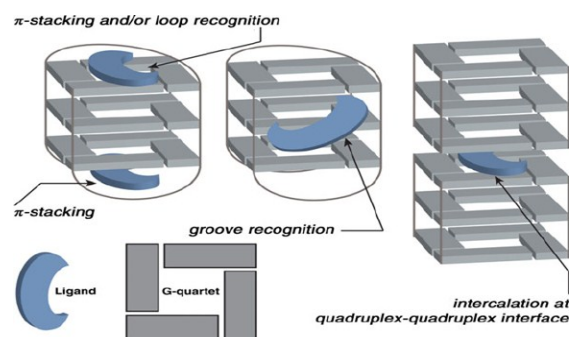

**Fig. S1** Different binding modes of ligand-GQ-DNA interaction.

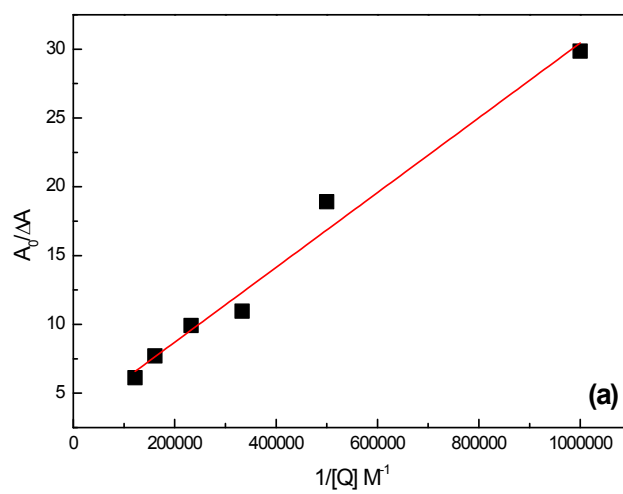

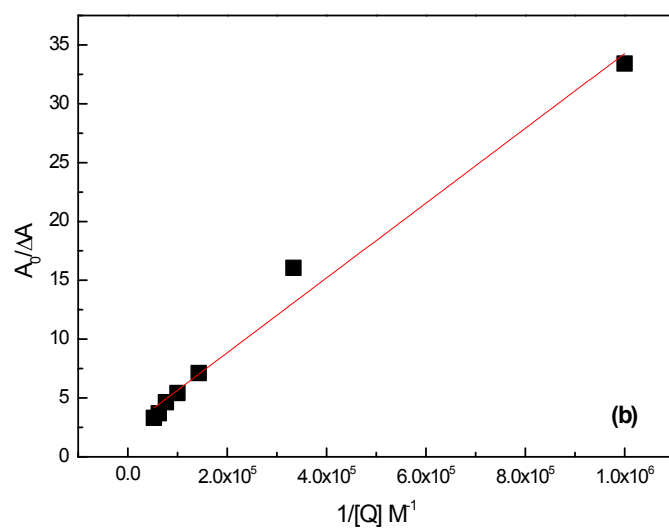

**Fig. S2.** Modified Benesi-Hildebrand plot for (a) Harmine-GQ-DNA absorption, (b) Harmine-B-DNA absorption.

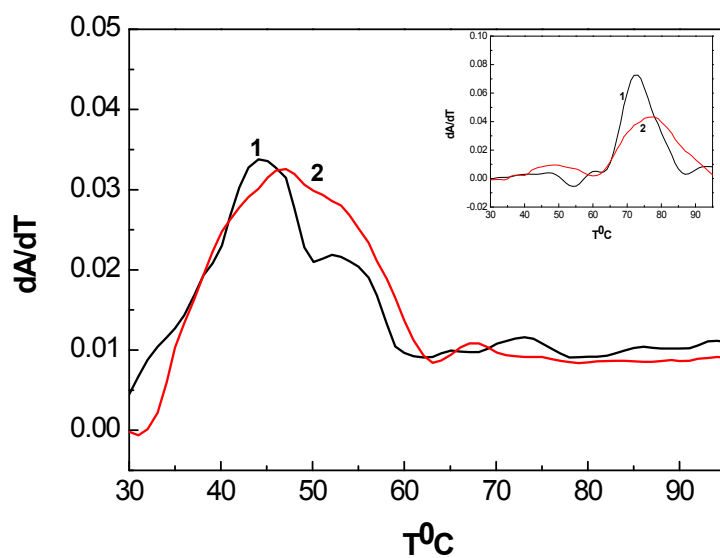

**Figure S3.** Derivative plots of melting profile of G-quadruplex (inset: B-DNA) in the (1) absence and (2) presence of HR as indicated on the graph.

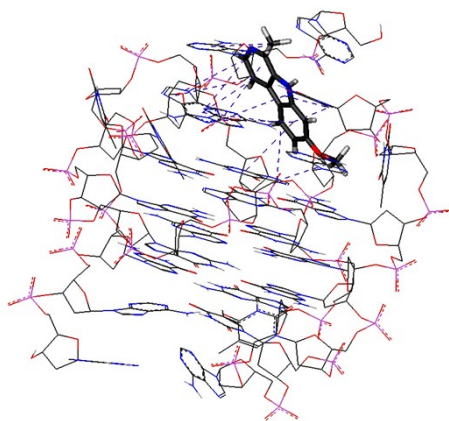

**Fig. S4.** Docked structure of HR-GQ-DNA complex (another representative snapshot in different view of loop binding).

**Table S1.** Comparative FID results for HR.

| DNA    | DC <sub>50</sub> | Estimated Selectivity(2.5/°C) |
|--------|------------------|-------------------------------|
| B-DNA  | > 2.5μM          | 1.7                           |
| GQ-DNA | > 2.5μM          |                               |

**Table S2.** Fitted parameters of anisotropy decays of HR in the presence of GQ-DNA and B-DNA.

| Sample          | Fluorescence Lifetime (ns) | Rotational relaxation time (ps) | Pre-exponential Factor | Rotational relaxation time (ns) | Pre-Exponential Factor(β) | χ <sup>2</sup> |
|-----------------|----------------------------|---------------------------------|------------------------|---------------------------------|---------------------------|----------------|
| HR              | 6.50                       | 520                             | 1                      | -                               | -                         | 1.04           |
| HR+12 μM GQ-DNA | 6.50                       | 539                             | 0.88                   | 5.89                            | 0.12                      | 1.01           |
| HR+ 12 μM B-DNA | 6.50                       | 443                             | 0.83                   | 3.36                            | 0.17                      | 1.00           |
